# Supplementary material for: Supramolecular Association via Hg···S Secondary-Bonding Interactions in Crystals of Organomercury(II) Species: A Survey of the Cambridge Structure Database
Source: MDPI journal article supplement (doi:10.3390/cryst13030385), 2023-02-23
Supplement: s1 [file s1]

Archive with 1 entries (1 files):
- crystals-2233761-supplementary.pdf
