# Supplementary material for: Supramolecular Association via Hg···S Secondary-Bonding Interactions in Crystals of Organomercury(II) Species: A Survey of the Cambridge Structure Database
Source: MDPI journal article supplement (doi:10.3390/cryst13030385), 2023-02-23
Supplement: s1 [file s1 › crystals-2233761-supplementary.pdf]

# Supramolecular Association via Hg $\cdots$ S Secondary-Bonding Interactions in Crystals of Organomercury(II) Species: A Survey of the Cambridge Structure Database

Edward R.T. Tiekink

Research Centre for Crystalline Materials, School of Medical and Life Sciences, Sunway University,  
Badar Sunway 47500, Selangor Darul Ehsan, Malaysia; edwardt@sunway.edu.my; Tel.: +60-374917181

## SUPPLEMENTARY MATERIALS

### 1. Zero-dimensional aggregates featuring Hg $\cdots$ S secondary-bonding interactions.

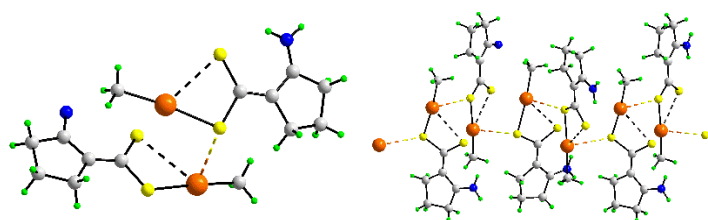

**Figure S1.** [IHOLEW](#) (2-Aminocyclopent-1-ene-1-carbodithioato)-methyl-mercury(II) [39]

$d(\text{Hg}\cdots\text{S}) = 3.328(3) \text{ \AA}$ ;  $\text{Hg}-\text{S}\cdots\text{Hg} = 97.35(8)^\circ$ ;  $\text{C}-\text{S}\cdots\text{Hg} = 119.9(3)^\circ$

$\text{S}-\text{Hg}\cdots\text{S} = 85.76(7)^\circ$ ;  $\text{C}-\text{Hg}\cdots\text{S} = 98.3(3)^\circ$

{Two independent molecules comprise the asymmetric unit which are connected by a Hg $\cdots$ S interaction. Intramolecular Hg $\cdots$ S contacts are noted with Hg $\cdots$ S = 3.080(2) and 3.163(3)  $\text{\AA}$ ; the second, longer value involves the Hg atom forming the intermolecular contact. Another Hg $\cdots$ S interaction beyond the van der Waals distance criterion is noted (Hg $\cdots$ S = 3.362(2)  $\text{\AA}$  which connects the dimers into a twisted, supramolecular chain. See [IHOLEW01](#) (57) for a polymorphic crystal}

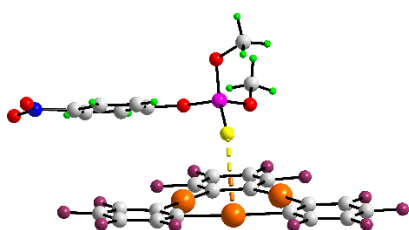

**Figure S2.** CEJNUB tris( $\mu_2$ -Perfluoro-o-phenylene)-tri-mercury bis(dimethyl(4-nitrophenyl)-thiophosphate) [38].

$d(\text{Hg}\cdots\text{S}) = 3.278(5) \text{ \AA}$ ;  $\text{C}-\text{S}\cdots\text{Hg} = 86.1(3) \text{ \& } 90.4(3)^\circ$

$\text{P}-\text{Hg}\cdots\text{S} = 154.3(2)^\circ$

{Two co-formers of the 1:2 co-crystal assemble into a zero-dimensional aggregate. If the van der Waals criterion was relaxed, the sulphur atom might be considered  $\mu_3$ -bridging with the additional  $\text{Hg}\cdots\text{S}$  separations being  $3.399(3)$  and  $3.428(3) \text{ \AA}$ . Indeed, the sulphur atom of the second molecule forms three similar contacts to the other side of the triangular face with  $\text{Hg}\cdots\text{S} = 3.375(3), 3.411(4) \text{ \& } 3.651(5) \text{ \AA}$ }

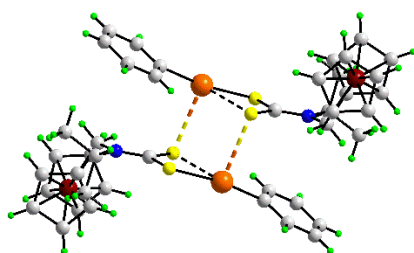

**Figure S3.** FUPFEC ((N-Isopropyl-N-(ferrocenyl)methyl)dithiocarbamato)-phenyl-mercury [40]

$d(\text{Hg}\cdots\text{S}) = 3.0773(13) \text{ \AA}$ ;  $\text{C}-\text{S}\cdots\text{Hg} = 90.33(16)^\circ$

$\text{S}-\text{Hg}\cdots\text{S} = 89.24(4)^\circ$ ;  $\text{C}-\text{Hg}\cdots\text{S} = 99.81(13)^\circ$

{The molecules associate about a centre of inversion to form a zero-dimensional aggregate. An intramolecular  $\text{Hg}\cdots\text{S}$  contact =  $2.9025(7) \text{ \AA}$  is noted}

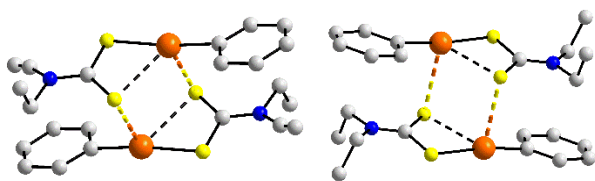

**Figure S4.** FOKBIQ Phenyl-(diethylthiocarbamato)-mercury(II) [41]

$d(\text{Hg}\cdots\text{S}) = 3.133(3) \text{ \AA}$ ;  $\text{C}-\text{S}\cdots\text{Hg} = 92.8(3)^\circ$

$\text{S}-\text{Hg}\cdots\text{S} = 91.01(8)^\circ$ ;  $\text{C}-\text{Hg}\cdots\text{S} = 96.7(3)^\circ$

$d(\text{Hg}\cdots\text{S}) = 3.191(3) \text{ \AA}$ ;  $\text{C}-\text{S}\cdots\text{Hg} = 86.7(3)^\circ$

$\text{S}-\text{Hg}\cdots\text{S} = 91.13(8)^\circ$ ;  $\text{C}-\text{Hg}\cdots\text{S} = 97.4(3)^\circ$

{Two independent molecules. Each molecule associates about a centre of inversion to form a zero-dimensional aggregate. An intramolecular Hg...S contact in each molecule is noted = 2.978(2) and 2.923(3) Å}

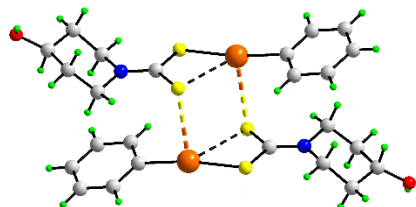

**Figure S5.** LUWZOU (4-Hydroxypiperidine-1-carbodithioato)-phenyl-mercury(II) chloroform solvate [42].

$d(\text{Hg}\cdots\text{S}) = 3.145(2)$  Å;  $\text{C}-\text{S}\cdots\text{Hg} = 92.9(3)^\circ$

$\text{S}-\text{Hg}\cdots\text{S} = 90.77(7)^\circ$ ;  $\text{C}-\text{Hg}\cdots\text{S} = 95.9(3)^\circ$

{The molecules associate about a centre of inversion to form a zero-dimensional aggregate. An intramolecular Hg...S contact = 3.016(3) Å is noted}

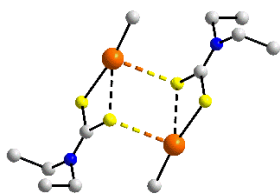

**Figure S6.** MEDTHG Methyl-(N,N-diethyldithiocarbamato)-mercury(II) [43]

$d(\text{Hg}\cdots\text{S}) = 3.148(8)$  Å;  $\text{C}-\text{S}\cdots\text{Hg} = 98.8(8)^\circ$

$\text{S}-\text{Hg}\cdots\text{S} = 90.2(2)^\circ$ ;  $\text{C}-\text{Hg}\cdots\text{S} = 96.9(5)^\circ$

{The molecules associate about a centre of inversion to form a zero-dimensional aggregate. An intramolecular Hg...S contact = 2.963(8) Å is noted}

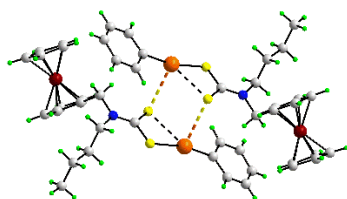

**Figure S7.** FUPFIG ((N-butyl-N-(ferrocenyl)methyl)dithiocarbamato)-phenyl-mercury(II) [40].

$d(\text{Hg}\cdots\text{S}) = 3.161(5) \text{ \AA}$ ;  $\text{C}-\text{S}\cdots\text{Hg} = 99.3(6)^\circ$

$\text{S}-\text{Hg}\cdots\text{S} = 92.50(13)^\circ$ ;  $\text{C}-\text{Hg}\cdots\text{S} = 97.8(5)^\circ$

{The molecule associates about a centre of inversion to form a zero-dimensional aggregate.  
An intramolecular  $\text{Hg}\cdots\text{S}$  contact in each molecule is noted =  $2.954(5) \text{ \AA}$ }

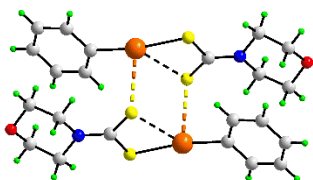

**Figure S8.** YOLJAL (Morpholinedithiocarbamato)-phenyl-mercury(II) [44]

$d(\text{Hg}\cdots\text{S}) = 3.1727(13) \text{ \AA}$ ;  $\text{C}-\text{S}\cdots\text{Hg} = 90.01(17)^\circ$

$\text{S}-\text{Hg}\cdots\text{S} = 91.81(4)^\circ$ ;  $\text{C}-\text{Hg}\cdots\text{S} = 98.17(13)^\circ$

{The molecules associate about a centre of inversion to form a zero-dimensional aggregate.  
An intramolecular  $\text{Hg}\cdots\text{S}$  contact =  $2.9725(13) \text{ \AA}$  is noted}

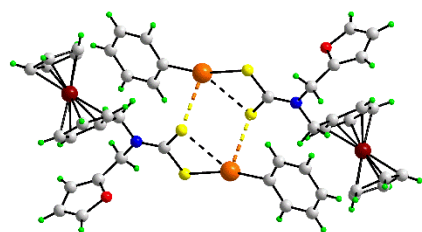

**Figure S9.** EKIYUT Phenyl-((furan-2-ylmethyl(ferrocenylmethyl)amino)dithiocarbamato)-mercury(II) [45].

$d(\text{Hg}\cdots\text{S}) = 3.174(3) \text{ \AA}$ ;  $\text{C}-\text{S}\cdots\text{Hg} = 94.6(4)^\circ$

$\text{S}-\text{Hg}\cdots\text{S} = 89.94(7)^\circ$ ;  $\text{C}-\text{Hg}\cdots\text{S} = 99.6(3)^\circ$

{The molecules associate about a centre of inversion to form a zero-dimensional aggregate.  
An intramolecular  $\text{Hg}\cdots\text{S}$  contact =  $2.981(2) \text{ \AA}$  is noted}

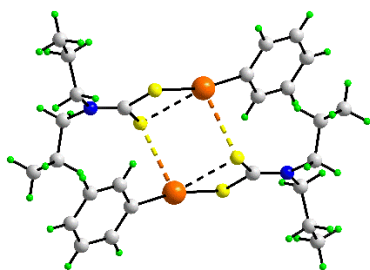

**Figure S10.** GUVQUJ Phenyl-(N,N-di-n-propyldithiocarbamato-S,S')-mercury(II) [46].

$d(\text{Hg}\cdots\text{S}) = 3.1809(9) \text{ \AA}$ ;  $\text{C}-\text{S}\cdots\text{Hg} = 93.54(13)^\circ$

$\text{S}-\text{Hg}\cdots\text{S} = 90.54(3)^\circ$ ;  $\text{C}-\text{Hg}\cdots\text{S} = 97.28(10)^\circ$

{The molecules associate about a centre of inversion to form a zero-dimensional aggregate.  
An intramolecular  $\text{Hg}\cdots\text{S}$  contact =  $2.9093(12) \text{ \AA}$  is noted}

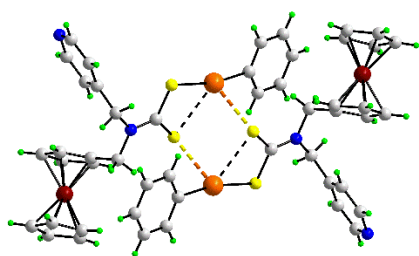

**Figure S11.** EKIYON Phenyl-((ferrocenylmethyl(4-pyridinylmethyl)amino)dithiocarbamato)-mercury(II) [45].

$d(\text{Hg}\cdots\text{S}) = 3.181(3) \text{ \AA}$ ;  $\text{C}-\text{S}\cdots\text{Hg} = 98.5(4)^\circ$

$\text{S}-\text{Hg}\cdots\text{S} = 93.27(9)^\circ$ ;  $\text{C}-\text{Hg}\cdots\text{S} = 95.5(3)^\circ$

{The molecules associate about a centre of inversion to form a zero-dimensional aggregate.  
An intramolecular  $\text{Hg}\cdots\text{S}$  contact =  $2.958(3) \text{ \AA}$  is noted}

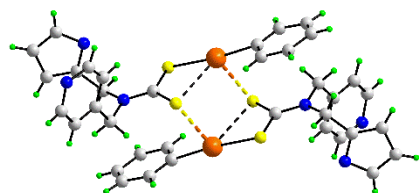

**Figure S12.** FODRUN (N-(4-Pyridylmethyl)-N-(pyrrol-2-yl)dithiocarbamato-S,S')-phenylmercury(II) methanol solvate [47].

$d(\text{Hg}\cdots\text{S}) = 3.191(5) \text{ \AA}$ ;  $\text{C}-\text{S}\cdots\text{Hg} = 88.8(5)^\circ$

$\text{S-Hg}\cdots\text{S} = 92.87(13)^\circ$ ;  $\text{C-Hg}\cdots\text{S} = 92.1(4)^\circ$

{The molecules associate about a centre of inversion to form a zero-dimensional aggregate.  
An intramolecular  $\text{Hg}\cdots\text{S}$  contact =  $3.020(5)$  Å is noted}

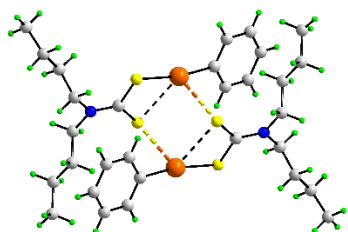

**Figure S13.** YOLHUD (Di-n-butylldithiocarbamato)-phenyl-mercury(II) [44].

$d(\text{Hg}\cdots\text{S}) = 3.2179(18)$  Å;  $\text{C-S}\cdots\text{Hg} = 98.5(2)^\circ$

$\text{S-Hg}\cdots\text{S} = 94.03(6)^\circ$ ;  $\text{C-Hg}\cdots\text{S} = 93.1(2)^\circ$

{The molecules associate about a centre of inversion to form a zero-dimensional aggregate.  
An intramolecular  $\text{Hg}\cdots\text{S}$  contact =  $2.9465(19)$  Å is noted}

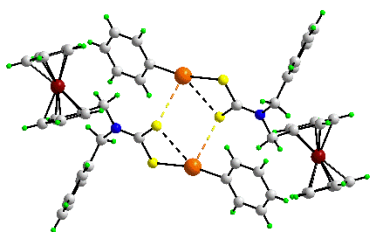

**Figure S14.** FUPFAY ((N-benzyl-N-(ferrocenyl)methyl)dithiocarbamato)-phenyl-mercury(II) [40].

$d(\text{Hg}\cdots\text{S}) = 3.230(2)$  Å;  $\text{C-S}\cdots\text{Hg} = 96.5(3)^\circ$

$\text{S-Hg}\cdots\text{S} = 92.02(7)^\circ$ ;  $\text{C-Hg}\cdots\text{S} = 96.9(2)^\circ$

{The molecules associate about a centre of inversion to form a zero-dimensional aggregate.  
An intramolecular  $\text{Hg}\cdots\text{S}$  contact =  $2.965(2)$  Å is noted}

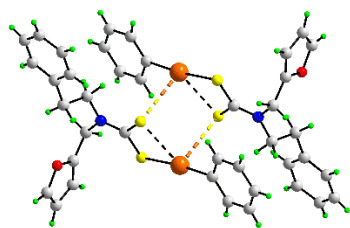

**Figure S15.** NEGRID (N-furfuryl-N-(2-phenylethyl)dithiocarbamato-*S,S'*)-phenyl-mercury(II) [48].

$d(\text{Hg}\cdots\text{S}) = 3.2479(15) \text{ \AA}$ ;  $\text{C}-\text{S}\cdots\text{Hg} = 93.80(18)^\circ$

$\text{S}-\text{Hg}\cdots\text{S} = 91.65(4)^\circ$ ;  $\text{C}-\text{Hg}\cdots\text{S} = 92.53(14)^\circ$

{The molecules associate about a centre of inversion to form a zero-dimensional aggregate. An intramolecular  $\text{Hg}\cdots\text{S}$  contact =  $2.9026(15) \text{ \AA}$  is noted}

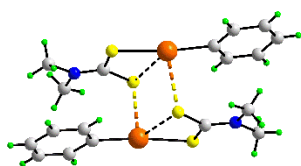

**Figure S16.** HEGGOS (dimethylcarbamodithioato)-phenyl-mercury(II) [49].

$d(\text{Hg}\cdots\text{S}) = 3.251(2) \text{ \AA}$ ;  $\text{C}-\text{S}\cdots\text{Hg} = 87.8(2)^\circ$

$\text{S}-\text{Hg}\cdots\text{S} = 87.8(7)^\circ$ ;  $\text{C}-\text{Hg}\cdots\text{S} = 99.2(2)^\circ$

$d(\text{Hg}\cdots\text{S}) = 3.341(2) \text{ \AA}$ ;  $\text{C}-\text{S}\cdots\text{Hg} = 87.1(2)^\circ$

$\text{S}-\text{Hg}\cdots\text{S} = 94.65(6)^\circ$ ;  $\text{C}-\text{Hg}\cdots\text{S} = 92.9(2)^\circ$

{There are two independent molecules in the asymmetric unit and these associate via a pair of  $\text{Hg}\cdots\text{S}$  interactions to form a zero-dimensional aggregate. Intramolecular  $\text{Hg}\cdots\text{S}$  contacts are noted, i.e.,  $2.939(2)$  and  $3.011(2) \text{ \AA}$  is noted}

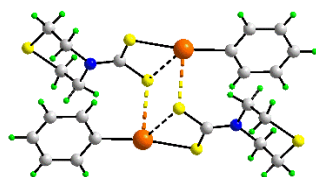

**Figure S17.** YOMXUV Phenyl-(thiomorpholine-4-carbodithioato)-mercury(II) [50].

$d(\text{Hg}\cdots\text{S}) = 3.252(4) \text{ \AA}$ ;  $\text{C}-\text{S}\cdots\text{Hg} = 93.2(6)^\circ$

$\text{S}\cdots\text{Hg}\cdots\text{S} = 92.47(14)^\circ$ ;  $\text{C}\cdots\text{Hg}\cdots\text{S} = 95.6(5)^\circ$

{Centrosymmetrically related molecules assemble into a dimeric aggregate. An intramolecular  $\text{Hg}\cdots\text{S}$  contact of  $2.998(5)$  Å is noted}

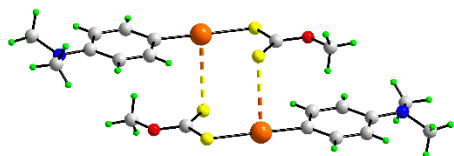

**Figure S18.** LAJGOV (4-(Dimethylamino)phenyl)-(O-methyl carbonodithioato)-mercury [51].

$d(\text{Hg}\cdots\text{S}) = 3.2649(15)$  Å;  $\text{C}\cdots\text{S}\cdots\text{Hg} = 93.67(16)^\circ$

$\text{S}\cdots\text{Hg}\cdots\text{S} = 86.99(4)^\circ$ ;  $\text{C}\cdots\text{Hg}\cdots\text{S} = 93.45(16)^\circ$

{The molecules associate about a centre of inversion to form a zero-dimensional aggregate. An intramolecular  $\text{Hg}\cdots\text{S}$  contact =  $3.1128(14)$  Å is noted}

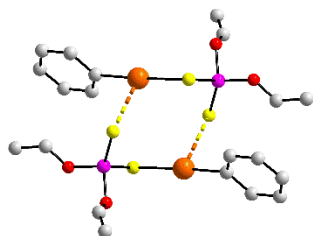

**Figure S19.** YAHFIW (Diethyldithiophosphate)-phenyl-mercury(II) [52].

$d(\text{Hg}\cdots\text{S}) = 3.325(6)$  Å;  $\text{P}\cdots\text{S}\cdots\text{Hg} = 93.6(3)^\circ$

$\text{S}\cdots\text{Hg}\cdots\text{S} = 83.60(17)^\circ$ ;  $\text{C}\cdots\text{Hg}\cdots\text{S} = 100.4(4)^\circ$

{Centrosymmetrically related molecules assemble into a dimeric aggregate}

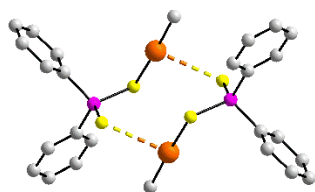

**Figure S20.** VIHCUK Methyl-(diphenyldithiophosphate)-mercury(II) [53].

$d(\text{Hg}\cdots\text{S}) = 3.152(3) \text{ \AA}$ ;  $\text{P}-\text{S}\cdots\text{Hg} = 92.88(11)^\circ$

$\text{S}-\text{Hg}\cdots\text{S} = 84.67(8)^\circ$ ;  $\text{C}-\text{Hg}\cdots\text{S} = 97.0(3)^\circ$

{Centrosymmetrically related molecules assemble into a dimeric aggregate}

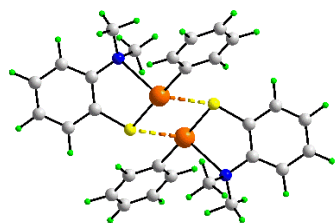

**Figure S21.** BEBLUP 2-Dimethylaminothiophenolato-phenyl-mercury(II) [55].

$d(\text{Hg}\cdots\text{S}) = 3.224(2) \text{ \AA}$ ;  $\text{Hg}-\text{S}\cdots\text{Hg} = 94.55(5)^\circ$ ;  $\text{C}-\text{S}\cdots\text{Hg} = 127.7(2)^\circ$

$\text{S}-\text{Hg}\cdots\text{S} = 85.45(6)^\circ$ ;  $\text{C}-\text{Hg}\cdots\text{S} = 94.91(19)^\circ$

{H atoms added by Mercury. Centrosymmetrically related molecules assemble into a dimeric aggregate. Intramolecular  $d(\text{Hg}\cdots\text{N}) = 2.657(6) \text{ \AA}$ }

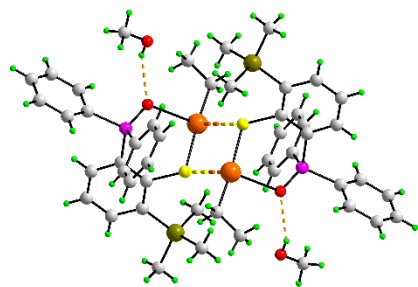

**Figure S22.** VIYLAR Ethyl-((hydroxy-O)(diphenyl)(2-(sulfanyl-S)-3-(trimethylsilyl)phenyl)-phosphoniumato)-mercury methanol solvate [56].

$d(\text{Hg}\cdots\text{S}) = 3.2498(11) \text{ \AA}$ ;  $\text{Hg}-\text{S}\cdots\text{Hg} = 103.08(3)^\circ$ ;  $\text{C}-\text{S}\cdots\text{Hg} = 142.26(12)^\circ$

$\text{S}-\text{Hg}\cdots\text{S} = 76.92(3)^\circ$ ;  $\text{C}-\text{Hg}\cdots\text{S} = 102.34(19)^\circ$

{Centrosymmetrically related molecules assemble into a dimeric aggregate. Intramolecular  $d(\text{Hg}\cdots\text{O}) = 2.712(4) \text{ \AA}$ . Methanol-O-H $\cdots$ O(oxide) hydrogen bonds are shown as orange dashed lines}

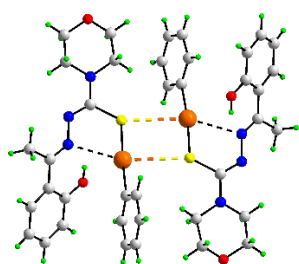

**Figure S23.** BORCIV (N-(1-(2-Hydroxyphenyl)ethylidene)-4-morpholinecarbohydrazonothioato-S)-(phenyl)-mercury [59].

$d(\text{Hg}\cdots\text{S}) = 3.250(2) \text{ \AA}$ ;  $\text{Hg}-\text{S}\cdots\text{Hg} = 90.33(6)^\circ$ ;  $\text{C}-\text{S}\cdots\text{Hg} = 148.0(3)^\circ$

$\text{S}-\text{Hg}\cdots\text{S} = 90.61(6)^\circ$ ;  $\text{C}-\text{Hg}\cdots\text{S} = 83.4(2)^\circ$

$d(\text{Hg}\cdots\text{S}) = 3.289(2) \text{ \AA}$ ;  $\text{Hg}-\text{S}\cdots\text{Hg} = 89.26(6)^\circ$ ;  $\text{C}-\text{S}\cdots\text{Hg} = 146.6(3)^\circ$

$\text{S}-\text{Hg}\cdots\text{S} = 89.79(6)^\circ$ ;  $\text{C}-\text{Hg}\cdots\text{S} = 89.78(19)^\circ$

{Two independent molecules associate to form a dimeric aggregate. Intramolecular  $d(\text{Hg}\cdots\text{N}) = 2.801(7) \text{ \AA}$  and  $d(\text{Hg}\cdots\text{N}) = 2.862(7) \text{ \AA}$ }

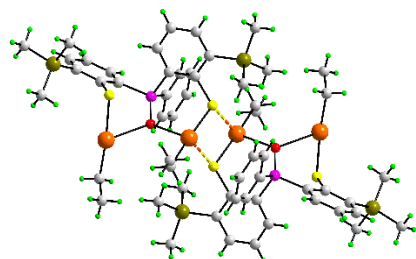

**Figure S24.** VIYLIZ ( $\mu_2$ -bis(3-Trimethylsilylphenyl-2-thiolato)phenyl(oxo)phosphanyl-S,S)-diethyl-di-mercury(II) [56].

$d(\text{Hg}\cdots\text{S}) = 3.256(2) \text{ \AA}$ ;  $\text{Hg}-\text{S}\cdots\text{Hg} = 106.86(7)^\circ$ ;  $\text{C}-\text{S}\cdots\text{Hg} = 136.92(2)^\circ$

$\text{S}-\text{Hg}\cdots\text{S} = 73.14(6)^\circ$ ;  $\text{C}-\text{Hg}\cdots\text{S} = 108.7(3)^\circ$

{Centrosymmetrically related molecules assemble into a dimeric aggregate. The  $\text{Hg}\cdots\text{O}$  separations are  $2.700(4)$  and  $2.748(6) \text{ \AA}$  for the endo- and exo-cyclic contacts, respectively}

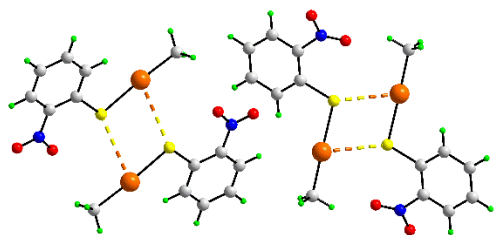

**Figure S25.** NEFDEH Methyl-(2-nitrobenzenethiolato)-mercury(II) [58].

$d(\text{Hg}\cdots\text{S}) = 3.257(4) \text{ \AA}$ ;  $\text{Hg}-\text{S}\cdots\text{Hg} = 105.61(14)^\circ$ ;  $\text{C}-\text{S}\cdots\text{Hg} = 130.3(3)^\circ$  {right-hand dimer}

$\text{S}-\text{Hg}\cdots\text{S} = 74.39(13)^\circ$ ;  $\text{C}-\text{Hg}\cdots\text{S} = 103.4(6)^\circ$

$d(\text{Hg}\cdots\text{S}) = 3.321(4) \text{ \AA}$ ;  $\text{Hg}-\text{S}\cdots\text{Hg} = 107.25(14)^\circ$ ;  $\text{C}-\text{S}\cdots\text{Hg} = 131.2(3)^\circ$

$\text{S}-\text{Hg}\cdots\text{S} = 72.75(13)^\circ$ ;  $\text{C}-\text{Hg}\cdots\text{S} = 103.7(4)^\circ$

{Two independent molecules. Centrosymmetrically related molecules assemble into a dimeric aggregate}

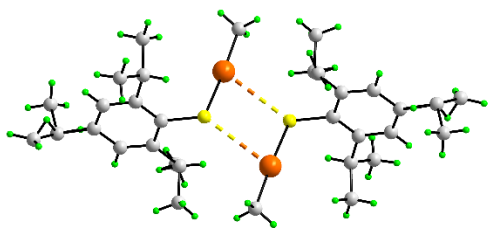

**Figure S26.** JETYEM Methyl-(2,4,6-tri-isopropylbenzenethiolato)-mercury(II) [59].

$d(\text{Hg}\cdots\text{S}) = 3.269(4) \text{ \AA}$ ;  $\text{Hg}-\text{S}\cdots\text{Hg} = 100.63(13)$ ;  $\text{C}-\text{S}\cdots\text{Hg} = 134.6(4)^\circ$

$\text{S}-\text{Hg}\cdots\text{S} = 79.37(12)^\circ$ ;  $\text{C}-\text{Hg}\cdots\text{S} = 104.2(6)^\circ$

{Centrosymmetrically related molecules assemble into a dimeric aggregate}

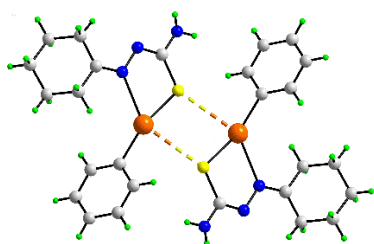

**Figure S27.** PAVVOY (Cyclohexanone thiosemicarbazonato-N,S)-phenyl-mercury(II) [60].

$d(\text{Hg}\cdots\text{S}) = 3.2758(11) \text{ \AA}$ ;  $\text{Hg}-\text{S}\cdots\text{Hg} = 102.88(4)$ ;  $\text{C}-\text{S}\cdots\text{Hg} = 150.17(12)^\circ$

$\text{S-Hg}\cdots\text{S} = 77.12(3)^\circ$ ;  $\text{C-Hg}\cdots\text{S} = 88.04(10)^\circ$

{Centrosymmetrically related molecules assemble into a dimeric aggregate; intramolecular  $\text{d(Hg}\cdots\text{N)} = 2.526(3) \text{ \AA}$ }

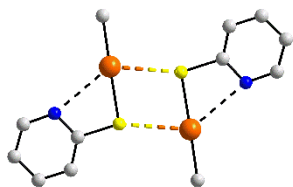

**Figure S28.** DOMCAJ01 Methyl-(pyridine-2-thiolato-S)-mercury(II) [61].

$\text{d(Hg}\cdots\text{S)} = 3.322(4) \text{ \AA}$ ;  $\text{Hg-S}\cdots\text{Hg} = 104.14(11)^\circ$ ;  $\text{C-S}\cdots\text{Hg} = 139.9(4)^\circ$

$\text{S-Hg}\cdots\text{S} = 75.86(10)^\circ$ ;  $\text{C-Hg}\cdots\text{S} = 101.6(3)^\circ$

{Centrosymmetrically related molecules assemble into a dimeric aggregate. An intramolecular  $\text{Hg}\cdots\text{N}$  contact of  $2.981(9) \text{ \AA}$  is noted}

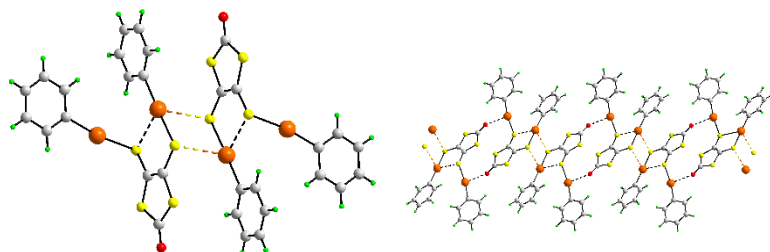

**Figure S29.** HUBRON bis( $\mu_2$ -4,5-disulfanyl-1,3-dithiol-2-one)-tetraphenyl-tetra-mercury [62].

$\text{d(Hg}\cdots\text{S)} = 3.3014(11) \text{ \AA}$ ;  $\text{Hg-S}\cdots\text{Hg} = 95.98(4)^\circ$ ;  $\text{C-S}\cdots\text{Hg} = 83.54(16)^\circ$

$\text{S-Hg}\cdots\text{S} = 80.02(4)^\circ$ ;  $\text{C-Hg}\cdots\text{S} = 101.51(13)^\circ$

{The di-nuclear molecules associate about a centre of inversion to form a zero-dimensional aggregate. An intramolecular  $\text{Hg}\cdots\text{S}$  contact of  $2.9315(12) \text{ \AA}$  is noted. Inter-dimer  $\text{Hg}\cdots\text{O}(\text{carbonyl})$  contacts of  $2.738(4) \text{ \AA}$  link the dimers into a linear, supramolecular chain}

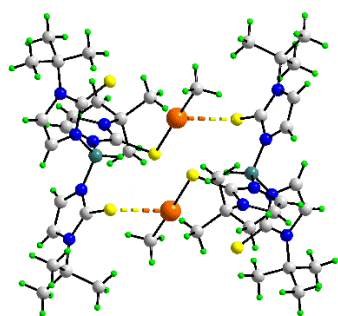

**Figure S30.** CIJPOB (Hydrogen tris(2-mercapto-1-t-butylimidazolyl)borate-S)-methyl-mercury(II) acetonitrile tetra-solvate [63].

$$d(\text{Hg}\cdots\text{S}) = 3.206(2) \text{ \AA}; \text{C-S}\cdots\text{Hg} = 88.1(2)^\circ$$

$$\text{S-Hg}\cdots\text{S} = 83.05(5)^\circ; \text{C-Hg}\cdots\text{S} = 96.7(2)^\circ$$

{Centrosymmetrically related molecules assemble into a dimeric aggregate. An additional  $\text{Hg}\cdots\text{S}$  contact is noted involving the third thione-S atom, i.e.,  $3.347(2) \text{ \AA}$ }

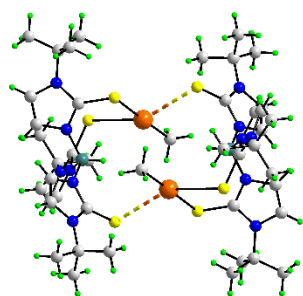

**Figure S31.** CIJPIV (Hydrogen tris(2-mercapto-1-t-butylimidazolyl)borate-S)-methyl-mercury(II) [63].

$$d(\text{Hg}\cdots\text{S}) = 3.2463(15) \text{ \AA}; \text{C-S}\cdots\text{Hg} = 98.29(17)^\circ$$

$$\text{S-Hg}\cdots\text{S} = 83.03(4)^\circ; \text{C-Hg}\cdots\text{S} = 93.9(3)^\circ$$

{Centrosymmetrically related molecules assemble into a dimeric aggregate. An additional  $\text{Hg}\cdots\text{S}$  contact is noted involving the third thione-S atom, i.e.,  $3.285(2) \text{ \AA}$ }

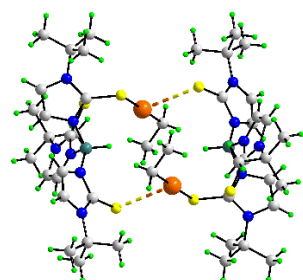

**Figure S32.** CIJQAO (Hydrogen tris(2-mercapto-1-t-butylimidazolyl)borate-S)-ethyl-mercury(ii) acetone hemi-solvate [63].

$d(\text{Hg}\cdots\text{S}) = 3.2523(6) \text{ \AA}$ ;  $\text{C}-\text{S}\cdots\text{Hg} = 99.88(7)^\circ$

$\text{S}-\text{Hg}\cdots\text{S} = 84.542(16)^\circ$ ;  $\text{C}-\text{Hg}\cdots\text{S} = 93.89(8)^\circ$

{Centrosymmetrically related molecules assemble into a dimeric aggregate. An intramolecular  $\text{Hg}\cdots\text{S}$  contact of  $3.318(6) \text{ \AA}$  is noted}

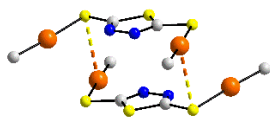

**Figure S33.** KAPWUT ( $\mu_2$ -1,3,4-Thiadiazole-2,5-dithiolato-S,S')-bis(methyl-mercury(II)) [64].

$d(\text{Hg}\cdots\text{S}) = 3.349(12) \text{ \AA}$ ;  $\text{Hg}-\text{S}\cdots\text{Hg} = 88.7(3)$ ;  $\text{C}-\text{S}\cdots\text{Hg} = 90(1)^\circ$

$\text{S}-\text{Hg}\cdots\text{S} = 85.9(4)^\circ$ ;  $\text{C}-\text{Hg}\cdots\text{S} = 94(2)^\circ$

{Centrosymmetrically related molecules assemble into a dimeric aggregate. Additional, weaker  $\text{Hg}\cdots\text{S}$  ( $3.429(13) \text{ \AA}$ ) interactions occur within the dimer involving the exocyclic mercury atom and the sulphur atom not involved in the endocyclic contact. An intramolecular  $\text{Hg}\cdots\text{N}$  contact ( $2.93(3) \text{ \AA}$ ) is noted as is an intermolecular  $\text{Hg}\cdots\text{N}$  contact of  $2.765(3) \text{ \AA}$  when all taken together link molecules into a 3D framework}

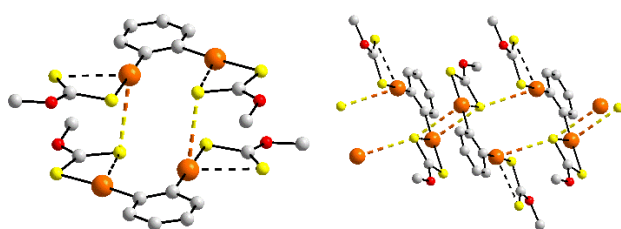

**Figure S34.** FAZBOX ( $\mu_2$ -O-Phenylene)-bis(O-methyl-xanthato-S)-di-mercury dichloromethane mono-solvate [65].

$d(\text{Hg}\cdots\text{S}) = 3.348(5) \text{ \AA}$ ;  $\text{C}-\text{S}\cdots\text{Hg} = 99.9(6)^\circ$

$\text{S}-\text{Hg}\cdots\text{S} = 82.91(15)^\circ$ ;  $\text{C}-\text{Hg}\cdots\text{S} = 97.7(4)^\circ$

{One of the mercury atoms of the di-nuclear molecule forms a  $\text{Hg}\cdots\text{S}$  contact about a centre of inversion. It is noted that the second mercury atom forms a  $\text{Hg}\cdots\text{S}$  contact but marginally outside of the distance criterion, i.e.,  $\text{Hg}\cdots\text{S} = 3.354(5) \text{ \AA}$ . Should the latter interaction be taken

into account, a twisted supramolecular chain eventuates, as shown in the right-hand image. Further, there are two intramolecular Hg $\cdots$ S interactions: 3.014(6) and 3.151(6) Å]

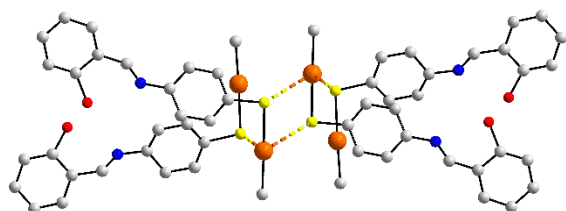

**Figure S35. QUGVUJ** (4-(o-Hydroxybenzylideneamino)phenylthiolato)-methyl-mercury(ii) [66].

d(Hg $\cdots$ S) = 3.316(8) Å; Hg–S $\cdots$ Hg = 102.2(2)°; C–S $\cdots$ Hg = 137(1)°

S–Hg $\cdots$ S = 77.8(2)°; C–Hg $\cdots$ S = 106(1)°

d(Hg $\cdots$ S) = 3.294(8) Å; Hg–S $\cdots$ Hg = 97.4(2)°; C–S $\cdots$ Hg = 107(1)°

S–Hg $\cdots$ S = 93.1(2)°; C–Hg $\cdots$ S = 90(1)°

{Two independent di-nuclear molecules. One assembles into a dimeric aggregate about a centre of inversion (first entry). The second independent molecule is attached at the periphery to form a four-molecule aggregate}

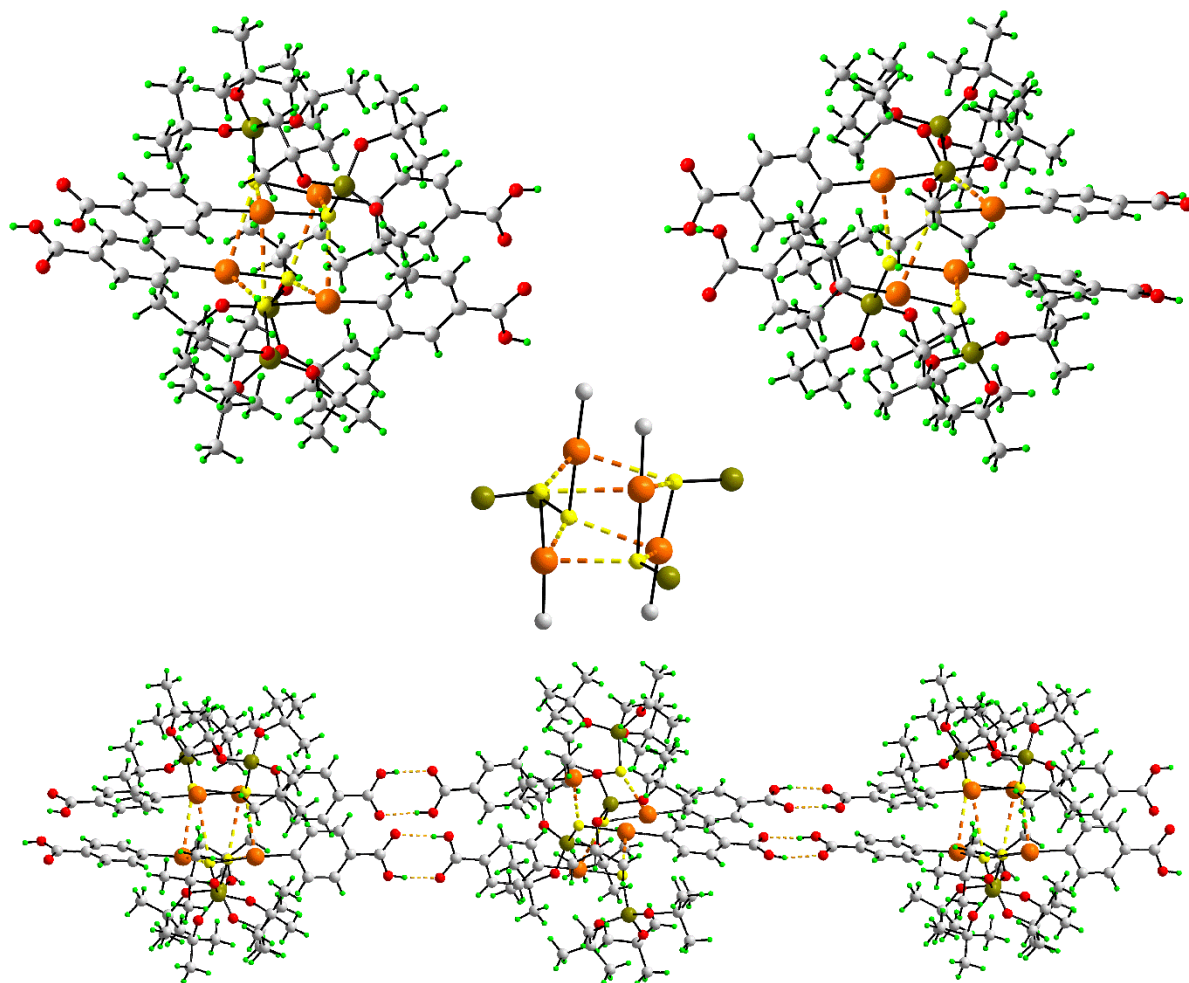

**Figure S36.** XUYROY 4-(Tri-t-butoxysilylthiomercurio)benzoic acid [67].

$d(\text{Hg}\cdots\text{S}) = 3.2465(15) \text{ \AA}$ ;  $\text{Hg-S}\cdots\text{Hg} = 95.0(4)^\circ$ ;  $\text{Si-S}\cdots\text{Hg} = 138.66(7)^\circ$

$\text{S-Hg}\cdots\text{S} = 88.83(4)^\circ$ ;  $\text{C-Hg}\cdots\text{S} = 97.33(13)^\circ$

$d(\text{Hg}\cdots\text{S}) = 3.3737(15) \text{ \AA}$ ;  $\text{Hg-S}\cdots\text{Hg} = 92.27(4)^\circ$ ;  $\text{Si-S}\cdots\text{Hg} = 138.23(8)^\circ$

$\text{S-Hg}\cdots\text{S} = 83.92(4)^\circ$ ;  $\text{C-Hg}\cdots\text{S} = 96.46(13)^\circ$

$d(\text{Hg}\cdots\text{S}) = 3.2365(18) \text{ \AA}$ ;  $\text{Hg-S}\cdots\text{Hg} = 104.34(6)^\circ$ ;  $\text{Si-S}\cdots\text{Hg} = 151.10(9)^\circ$

$\text{S-Hg}\cdots\text{S} = 87.11(5)^\circ$ ;  $\text{C-Hg}\cdots\text{S} = 95.54(18)^\circ$

{Two independent molecules. Each assembles into a tetrameric aggregate about a four-fold inversion centre (entry 1). For the first molecule, a distorted cube arises if one considers an interaction a little longer than the search criteria (second entry)); the second tier  $\text{Hg}\cdots\text{S}$  separations for the second tetramer to form the cube are considerably longer at  $3.7255(16) \text{ \AA}$ . The tetrameric molecules assemble into a helical ( $4_1$ -screw symmetry) supramolecular chain via carboxylate- $\text{O-H}\cdots\text{O}(\text{carbonyl})$  hydrogen bonds}

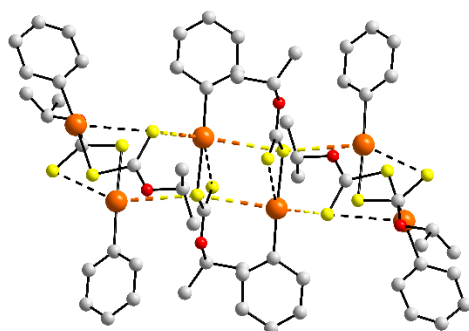

**Figure S37.** FOKBEM Phenyl-(isopropylxanthate-S)mercury(II) [65].

$d(\text{Hg}\cdots\text{S}) = 3.306(5) \text{ \AA}$ ;  $\text{Hg}-\text{S}\cdots\text{Hg} = 95.03(13)^\circ$ ;  $\text{C}-\text{S}\cdots\text{Hg} = 86.3(5)^\circ$

$\text{S}-\text{Hg}\cdots\text{S} = 84.97(12)^\circ$ ;  $\text{C}-\text{Hg}\cdots\text{S} = 97.0(3)^\circ$

$d(\text{Hg}\cdots\text{S}) = 3.332(4) \text{ \AA}$ ;  $\text{Hg}-\text{S}\cdots\text{Hg} = 97.51(13)^\circ$ ;  $\text{C}-\text{S}\cdots\text{Hg} = 86.1(5)^\circ$

$\text{S}-\text{Hg}\cdots\text{S} = 85.19(9)^\circ$ ;  $\text{C}-\text{Hg}\cdots\text{S} = 93.4(4)^\circ$

$d(\text{Hg}\cdots\text{S}) = 3.329(4) \text{ \AA}$ ;  $\text{C}-\text{S}\cdots\text{Hg} = 118.3(5)^\circ$

$\text{S}-\text{Hg}\cdots\text{S} = 80.91(13)^\circ$ ;  $\text{C}-\text{Hg}\cdots\text{S} = 94.7(4)^\circ$

{There are three independent molecules in the asymmetric unit. One pair associates about a centre of inversion and a  $\{\cdots\text{Hg}-\text{S}\}_2$  synthon ( $\text{Hg}\cdots\text{S} = 3.306(5) \text{ \AA}$ ). Each mercury atom of the dimer accepts a second  $\text{Hg}\cdots\text{S}$  interaction ( $3.332(4) \text{ \AA}$ ) from a pair of second independent molecules with the potential to form a second  $\{\cdots\text{Hg}-\text{S}\}_2$  synthon but the second  $\text{Hg}\cdots\text{S}$  separation well exceeds the sum of the van der Waals radii ( $3.457(3) \text{ \AA}$ ). At the same time employs the mercury atoms to form a pair of  $\text{Hg}\cdots\text{S}$  contacts ( $3.3286(4) \text{ \AA}$ ) with the third independent molecules. The result is a six-molecule aggregate. Intramolecular  $\text{Hg}\cdots\text{S}$  interactions are also noted, being  $3.159(5)$ ,  $3.309(4)$  &  $3.211(4) \text{ \AA}$ }

## 2. One-dimensional aggregation patterns sustained by Hg...S secondary-bonding interactions.

### 2.1. Linear

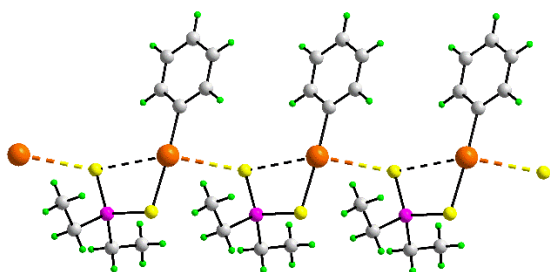

**Figure S38.** LENZIN (Diethyldithiophosphinato-S)-phenyl-mercury(II) [69].

$d(\text{Hg}\cdots\text{S}) = 3.182(3) \text{ \AA}$ ;  $\text{P-S}\cdots\text{Hg} = 119.32(2)^\circ$

$\text{S-Hg}\cdots\text{S} = 91.12(7)^\circ$ ;  $\text{C-Hg}\cdots\text{S} = 91.9(4)^\circ$

{Molecules assemble into a linear, one-dimensional chain via  $\text{Hg}\cdots\text{S}$  contacts. An intramolecular  $\text{Hg}\cdots\text{S}$  contact is also noted:  $3.182(3) \text{ \AA}$ }

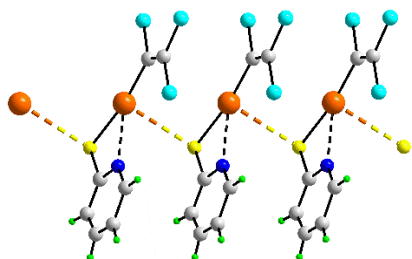

**Figure S39.** QIQHIH (2-Pyridylthiolato)-trichlorovinyl-mercury(II) [70].

$d(\text{Hg}\cdots\text{S}) = 3.330(7) \text{ \AA}$ ;  $\text{Hg-S}\cdots\text{Hg} = 89.1(2)^\circ$ ;  $\text{C-S}\cdots\text{Hg} = 108.4(8)^\circ$

$\text{S-Hg}\cdots\text{S} = 89.1(2)^\circ$ ;  $\text{C-Hg}\cdots\text{S} = 98.5(7)^\circ$

{Molecules assemble into a linear, one-dimensional chain via  $\text{Hg}\cdots\text{S}$  contacts. An intramolecular  $\text{Hg}\cdots\text{N}$  contact is also noted:  $2.808(19) \text{ \AA}$ }

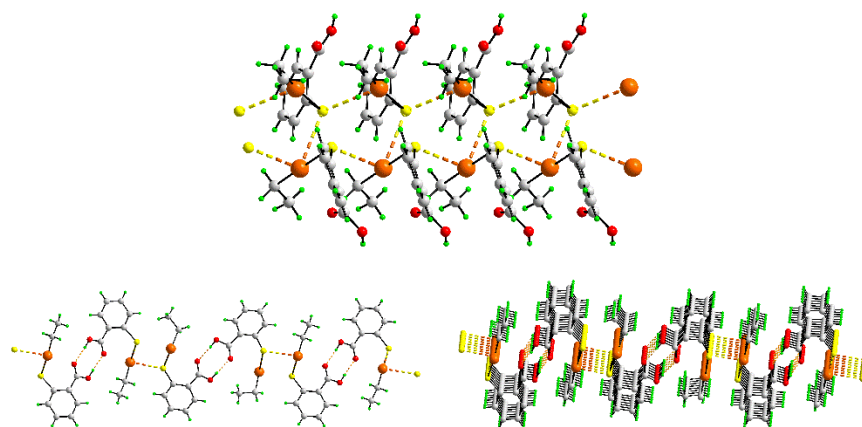

**Figure S40.** XUHHREY Ethyl-(2-carboxybenzenethiolato)-mercury(II) [71].

$d(\text{Hg}\cdots\text{S}) = 3.2613(13) \text{ \AA}$ ;  $\text{Hg}-\text{S}\cdots\text{Hg} = 90.14(4)^\circ$ ;  $\text{C}-\text{S}\cdots\text{Hg} = 112.99(17)^\circ$

$\text{S}-\text{Hg}\cdots\text{S} = 90.14(4)^\circ$ ;  $\text{C}-\text{Hg}\cdots\text{S} = 94.48(14)^\circ$

$d(\text{Hg}\cdots\text{S}) = 3.3247(13) \text{ \AA}$ ;  $\text{Hg}-\text{S}\cdots\text{Hg} = 90.72(4)^\circ$ ;  $\text{C}-\text{S}\cdots\text{Hg} = 128.08(17)^\circ$

$\text{S}-\text{Hg}\cdots\text{S} = 90.72(4)^\circ$ ;  $\text{C}-\text{Hg}\cdots\text{S} = 99.09(16)^\circ$

$d(\text{Hg}\cdots\text{S}) = 3.2851(13) \text{ \AA}$ ;  $\text{Hg}-\text{S}\cdots\text{Hg} = 85.13(4)^\circ$ ;  $\text{C}-\text{S}\cdots\text{Hg} = 117.01(17)^\circ$

$\text{S}-\text{Hg}\cdots\text{S} = 71.15(4)^\circ$ ;  $\text{C}-\text{Hg}\cdots\text{S} = 104.42(14)^\circ$

$d(\text{Hg}\cdots\text{S}) = 3.2252(13) \text{ \AA}$ ;  $\text{Hg}-\text{S}\cdots\text{Hg} = 91.03(4)^\circ$ ;  $\text{C}-\text{S}\cdots\text{Hg} = 124.98(17)^\circ$

$\text{S}-\text{Hg}\cdots\text{S} = 91.03(4)^\circ$ ;  $\text{C}-\text{Hg}\cdots\text{S} = 93.63(14)^\circ$

$d(\text{Hg}\cdots\text{S}) = 3.3110(13) \text{ \AA}$ ;  $\text{Hg}-\text{S}\cdots\text{Hg} = 89.10(4)^\circ$ ;  $\text{C}-\text{S}\cdots\text{Hg} = 142.93(17)^\circ$

$\text{S}-\text{Hg}\cdots\text{S} = 89.10(4)^\circ$ ;  $\text{C}-\text{Hg}\cdots\text{S} = 98.46(14)^\circ$

$d(\text{Hg}\cdots\text{S}) = 3.3567(13) \text{ \AA}$ ;  $\text{Hg}-\text{S}\cdots\text{Hg} = 80.43(4)^\circ$ ;  $\text{C}-\text{S}\cdots\text{Hg} = 108.57(16)^\circ$

$\text{S}-\text{Hg}\cdots\text{S} = 72.19(4)^\circ$ ;  $\text{C}-\text{Hg}\cdots\text{S} = 106.37(15)^\circ$

{There are four independent molecules in the asymmetric unit and each of these assemble into a linear, one-dimensional chain via an average of one  $\text{Hg}\cdots\text{S}$  contact per molecule; entries 1, 2, 4 and 5. Two of the strands (entries 1 and 2) are connected into a supramolecular tape via a further  $\text{Hg}\cdots\text{S}$  contact (entry 3). If an additional  $\text{Hg}\cdots\text{S}$  contact is taken into account, which is just beyond the sum of the van der Waals radii, i.e.,  $\text{Hg}\cdots\text{S} = 3.3567(13) \text{ \AA}$ , entry 6, the other two strands (entries 4 and 5) are also connected into a tape. The tapes are connected into a supramolecular layer via carboxylate- $\text{O}-\text{H}\cdots\text{O}$ (carbonyl) hydrogen bonds. Finally, each mercury atom forms an intramolecular  $\text{Hg}\cdots\text{O}$ (carbonyl) interaction with separations in the range from  $2.872(4)$  to  $2.901(4) \text{ \AA}$ . See XUHHREY01 (47), a polymorph}

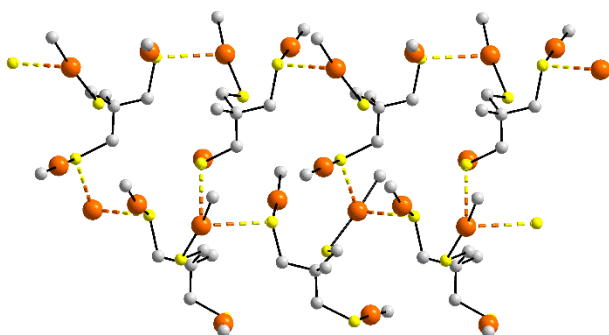

**Figure S41.** WAYPAN Trimethyl-( $\mu_3$ -1,1,1-tris(mercaptomethyl)ethane-S,S',S'')-tri-mercury(II) [72].

$d(\text{Hg}\cdots\text{S}) = 3.212(6) \text{ \AA}$ ;  $\text{Hg}-\text{S}\cdots\text{Hg} = 112.6(2)^\circ$ ;  $\text{C}-\text{S}\cdots\text{Hg} = 100.8(7)^\circ$

$\text{S}-\text{Hg}\cdots\text{S} = 98.12(19)^\circ$ ;  $\text{C}-\text{Hg}\cdots\text{S} = 93.1(7)^\circ$

$d(\text{Hg}\cdots\text{S}) = 3.344(7) \text{ \AA}$ ;  $\text{Hg}-\text{S}\cdots\text{Hg} = 116.4(2)^\circ$ ;  $\text{C}-\text{S}\cdots\text{Hg} = 104.1(8)^\circ$

$\text{S}-\text{Hg}\cdots\text{S} = 98.0(2)^\circ$ ;  $\text{C}-\text{Hg}\cdots\text{S} = 91.6(8)^\circ$

$d(\text{Hg}\cdots\text{S}) = 3.311(7) \text{ \AA}$ ;  $\text{Hg}-\text{S}\cdots\text{Hg} = 129.4(2)^\circ$ ;  $\text{C}-\text{S}\cdots\text{Hg} = 100.5(8)^\circ$

$\text{S}-\text{Hg}\cdots\text{S} = 97.9(2)^\circ$ ;  $\text{C}-\text{Hg}\cdots\text{S} = 87.0(8)^\circ$

{There are two independent tri-nuclear molecules and each of these assemble into a zig-zag, one-dimensional chain via an average of one  $\text{Hg}\cdots\text{S}$  contact per molecule. Adjacent chains assemble via a further inter-chain  $\text{Hg}\cdots\text{S}$  contact (third entry) to form a linear, double chain}

## 2.2. Zigzag

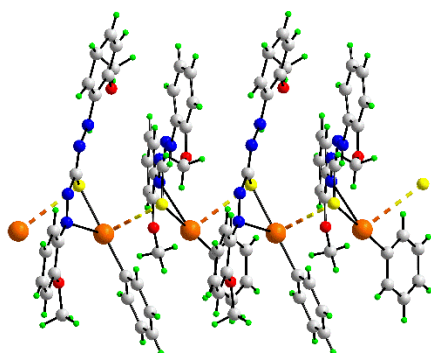

**Figure S42.** OBIZAC (1,5-bis(2-Methoxyphenyl)thiocarbazonato)-phenyl-mercury(II) [73].

$d(\text{Hg}\cdots\text{S}) = 3.2929(10) \text{ \AA}$ ;  $\text{Hg}-\text{S}\cdots\text{Hg} = 81.11(3)^\circ$ ;  $\text{C}-\text{S}\cdots\text{Hg} = 100.79(14)^\circ$

$\text{S}-\text{Hg}\cdots\text{S} = 93.96(3)^\circ$ ;  $\text{C}-\text{Hg}\cdots\text{S} = 86.43(11)^\circ$

{The molecules associate into a zig-zag supramolecular chain propagated by glide symmetry. An intramolecular  $\text{Hg}\cdots\text{N}$  contact of  $2.725(3) \text{ \AA}$  is noted}

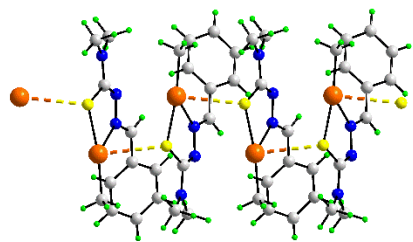

**Figure S43.** NESRUA (N'-Benzylidene-N,N-dimethylcarbamohydrazonothioato)-(methyl)mercury(II) [74].

$d(\text{Hg}\cdots\text{S}) = 3.293(5) \text{ \AA}$ ;  $\text{Hg}-\text{S}\cdots\text{Hg} = 102.31(17)^\circ$ ;  $\text{C}-\text{S}\cdots\text{Hg} = 97.5(5)^\circ$

$\text{S}-\text{Hg}\cdots\text{S} = 90.48(16)^\circ$ ;  $\text{C}-\text{Hg}\cdots\text{S} = 92.5(6)^\circ$

{The molecules assemble into a zigzag, one-dimensional chain via  $\text{Hg}\cdots\text{S}$  contacts. Intramolecular  $\text{Hg}\cdots\text{N}$  contacts of  $2.603(16) \text{ \AA}$  are noted}

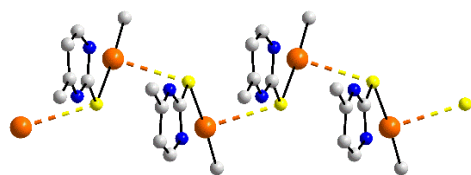

**Figure S44.** DOYFIG Methyl-(2-mercapto-4-methylpyrimidinato)-mercury(II) [75].

$d(\text{Hg}\cdots\text{S}) = 3.325(11) \text{ \AA}$ ;  $\text{Hg}-\text{S}\cdots\text{Hg} = 117.9(3)^\circ$ ;  $\text{C}-\text{S}\cdots\text{Hg} = 89.3(8)^\circ$

$\text{S}-\text{Hg}\cdots\text{S} = 91.6(3)^\circ$ ;  $\text{C}-\text{Hg}\cdots\text{S} = 92(1)^\circ$

{The molecules associate into a zig-zag supramolecular chain propagated by glide symmetry. An intramolecular  $\text{Hg}\cdots\text{N}$  contact of  $3.02(6) \text{ \AA}$  is noted as are  $\text{Hg}\cdots\text{Hg}$  contacts [ $3.805(3) \text{ \AA}$ ] leading to double chains}

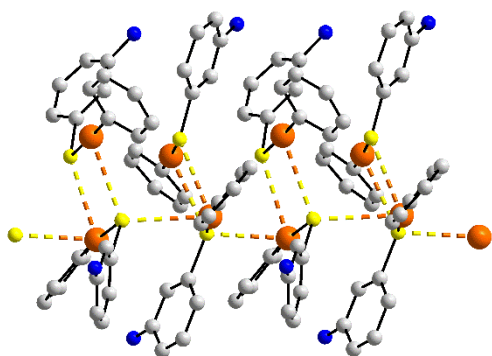

**Figure S45.** QUGVIX (3-Aminophenylthiolato)-phenyl-mercury(II) [66].

$d(\text{Hg}\cdots\text{S}) = 3.184(7) \text{ \AA}$ ;  $\text{Hg}-\text{S}\cdots\text{Hg} = 96.29(12)^\circ$ ;  $\text{C}-\text{S}\cdots\text{Hg} = 140.2(6)^\circ$

$\text{S}-\text{Hg}\cdots\text{S} = 85.23(16)^\circ$ ;  $\text{C}-\text{Hg}\cdots\text{S} = 97.4(7)^\circ$

$d(\text{Hg}\cdots\text{S}) = 3.251(7) \text{ \AA}$ ;  $\text{Hg}-\text{S}\cdots\text{Hg} = 94.59(12)^\circ$ ;  $\text{C}-\text{S}\cdots\text{Hg} = 132.7(7)^\circ$

$\text{S}-\text{Hg}\cdots\text{S} = 83.69(16)^\circ$ ;  $\text{C}-\text{Hg}\cdots\text{S} = 97.8(7)^\circ$

$d(\text{Hg}\cdots\text{S}) = 3.229(5) \text{ \AA}$ ;  $\text{Hg}-\text{S}\cdots\text{Hg} = 109.91(8)^\circ$ ;  $\text{C}-\text{S}\cdots\text{Hg} = 107.8(7)^\circ$

$\text{S}-\text{Hg}\cdots\text{S} = 89.87(13)^\circ$ ;  $\text{C}-\text{Hg}\cdots\text{S} = 95.0(5)^\circ$

{Two independent molecules assemble into a dimeric aggregate via two  $\text{Hg}\cdots\text{S}$  interactions (first two entries). These associate into a zig-zag supramolecular chain propagated by glide symmetry}

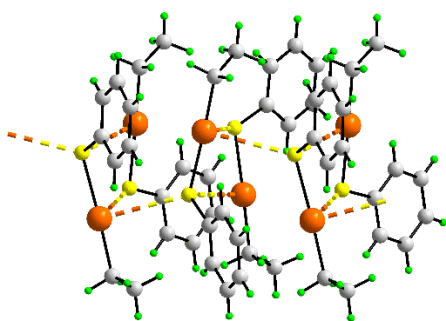

**Figure S46.** DOFNOC Ethyl-(phenylthiolato)-mercury(II) [76].

$d(\text{Hg}\cdots\text{S}) = 3.226(2) \text{ \AA}$ ;  $\text{Hg}-\text{S}\cdots\text{Hg} = 96.60(7)^\circ$ ;  $\text{C}-\text{S}\cdots\text{Hg} = 108.6(3)^\circ$

$\text{S}-\text{Hg}\cdots\text{S} = 81.75(8)^\circ$ ;  $\text{C}-\text{Hg}\cdots\text{S} = 96.4(3)^\circ$

$d(\text{Hg}\cdots\text{S}) = 3.312(2) \text{ \AA}$ ;  $\text{Hg}-\text{S}\cdots\text{Hg} = 94.79(7)^\circ$ ;  $\text{C}-\text{S}\cdots\text{Hg} = 145.0(3)^\circ$

$\text{S}-\text{Hg}\cdots\text{S} = 79.58(7)^\circ$ ;  $\text{C}-\text{Hg}\cdots\text{S} = 101.9(3)^\circ$

$d(\text{Hg}\cdots\text{S}) = 3.272(2) \text{ \AA}$ ;  $\text{Hg}-\text{S}\cdots\text{Hg} = 119.07(8)^\circ$ ;  $\text{C}-\text{S}\cdots\text{Hg} = 108.5(3)^\circ$

$\text{S-Hg}\cdots\text{S} = 89.53(7)^\circ$ ;  $\text{C-Hg}\cdots\text{S} = 92.6(3)^\circ$

{Two independent molecules assemble into a dimeric aggregate via two  $\text{Hg}\cdots\text{S}$  interactions (first two entries). These associate into a zig-zag supramolecular chain propagated by glide symmetry}

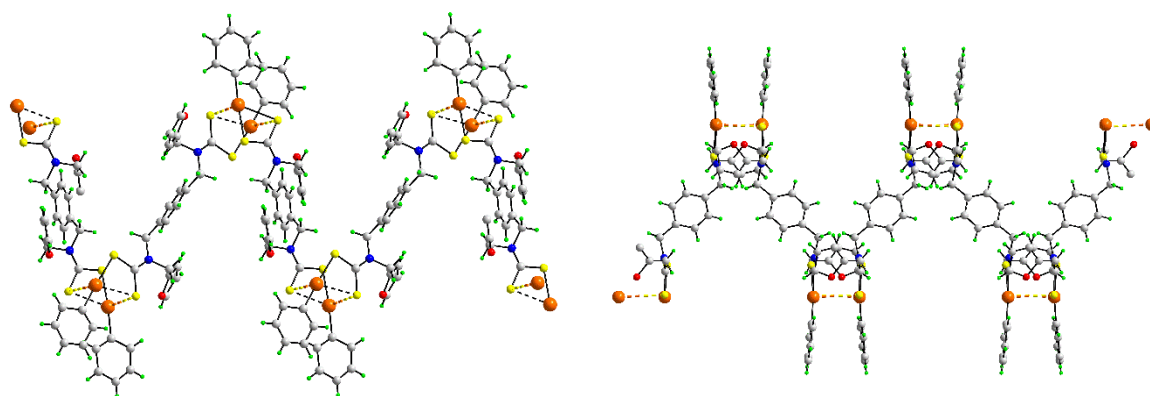

**Figure S47.** YOMXIJ ( $(\mu_2$ -(2-furylmethyl)(4-(((2-furylmethyl)((sulfanyl)(thioxo)methyl)amino)methyl)-benzyl)carbamo-dithioato)-diphenyl-di-mercury [50].

$d(\text{Hg}\cdots\text{S}) = 3.254(5) \text{ \AA}$ ;  $\text{Hg-S}\cdots\text{Hg} = 85.66(13)^\circ$ ;  $\text{C-S}\cdots\text{Hg} = 92.7(5)^\circ$

$\text{S-Hg}\cdots\text{S} = 93.07(16)^\circ$ ;  $\text{C-Hg}\cdots\text{S} = 94.7(5)^\circ$

{The di-nuclear molecule is disposed about a centre of inversion. Each end associate about a 2-fold axis of symmetry to form a zig-zag supramolecular chain propagated by glide symmetry. An intramolecular  $\text{Hg}\cdots\text{S}$  interaction of  $2.933(8) \text{ \AA}$  is noted}

### 2.3. Helical

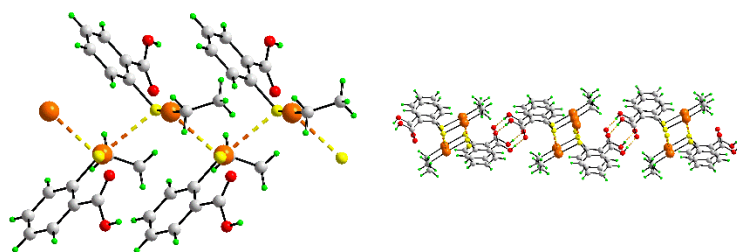

**Figure S48.** XUHREY01 Ethyl-(2-carboxybenzenethiolato)-mercury(II) [71].

$d(\text{Hg}\cdots\text{S}) = 3.0809(10) \text{ \AA}$ ;  $\text{Hg-S}\cdots\text{Hg} = 109.03(4)^\circ$ ;  $\text{C-S}\cdots\text{Hg} = 87.97(13)^\circ$

$\text{S-Hg}\cdots\text{S} = 85.62(3)^\circ$ ;  $\text{C-Hg}\cdots\text{S} = 94.35(13)^\circ$

{The molecules assemble into a helical ( $2_1$ -screw symmetry), one-dimensional chain via an average of one Hg $\cdots$ S contact per molecule. The tapes are connected into a supramolecular layer via carboxylate-O-H $\cdots$ O(carbonyl) hydrogen bonds. An intramolecular Hg $\cdots$ O(carbonyl) interaction is absent as the carbonyl-oxygen atom is directed away from the mercury atom. See [XUHREY \(40\)](#), for a polymorph}

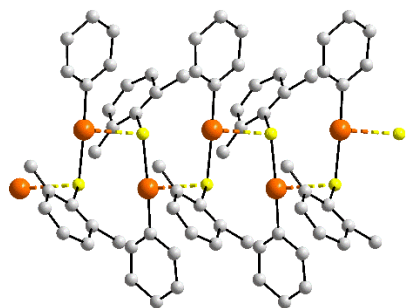

**Figure S49.** [PHGMSP](#) Phenylmercury-(2,6-dimethyl-thiophenolate) [77].

$d(\text{Hg}\cdots\text{S}) = 3.183(15) \text{ \AA}$ ;  $\text{Hg}-\text{S}\cdots\text{Hg} = 102.1(4)^\circ$ ;  $\text{C}-\text{S}\cdots\text{Hg} = 114(1)^\circ$

$\text{S}-\text{Hg}\cdots\text{S} = 86.4(4)^\circ$ ;  $\text{C}-\text{Hg}\cdots\text{S} = 100(2)^\circ$

{The molecules assemble into a helical ( $2_1$ -screw symmetry), one-dimensional chain via Hg $\cdots$ S contacts}

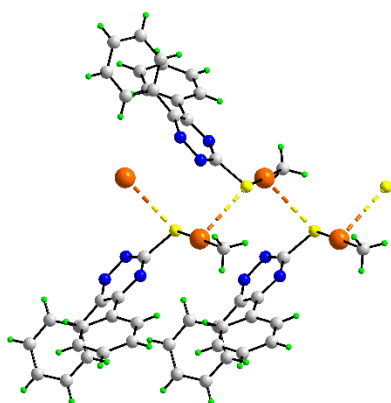

**Figure 50.** [OCOLEY](#) (4,5-Diphenyl-(1,2,4)triazine-3-thionato)-methyl-mercury [78].

$d(\text{Hg}\cdots\text{S}) = 3.3251(17) \text{ \AA}$ ;  $\text{Hg}-\text{S}\cdots\text{Hg} = 133.46(6)^\circ$ ;  $\text{C}-\text{S}\cdots\text{Hg} = 87.6(2)^\circ$

$\text{S}-\text{Hg}\cdots\text{S} = 78.08(5)^\circ$ ;  $\text{C}-\text{Hg}\cdots\text{S} = 101.2(2)^\circ$

{The molecules assemble into a helical ( $2_1$ -screw symmetry) one-dimensional chain via Hg $\cdots$ S contacts. Intramolecular Hg $\cdots$ N contacts of  $3.146(5) \text{ \AA}$  are noted}

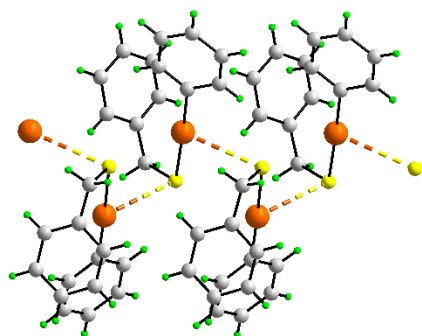

**Figure S51.** LAWYUB Phenyl(phenylmethanethiolato)mercury(II) [79].

$d(\text{Hg}\cdots\text{S}) = 3.290(3) \text{ \AA}$ ;  $\text{Hg}-\text{S}\cdots\text{Hg} = 95.82(7)^\circ$ ;  $\text{C}-\text{S}\cdots\text{Hg} = 88.6(3)^\circ$

$\text{S}-\text{Hg}\cdots\text{S} = 86.23(7)^\circ$ ;  $\text{C}-\text{Hg}\cdots\text{S} = 95.7(3)^\circ$

{Molecules assemble into a helical chain ( $2_1$ -screw symmetry) down the c-axis}

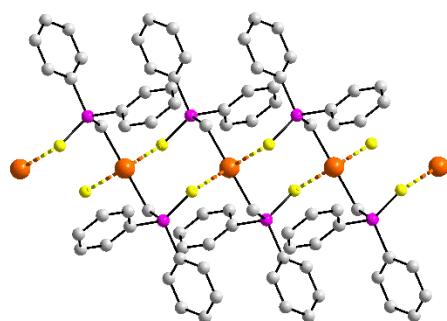

**Figure S52.** GILNOE bis(Methylene(diphenyl)thiophosphinate)-mercury(II) [80].

$d(\text{Hg}\cdots\text{S}) = 2 \times 3.179(5) \text{ \AA}$ ;  $\text{P}-\text{S}\cdots\text{Hg} = 103.6(2)^\circ$

$\text{C}-\text{Hg}\cdots\text{S} = 89.0(5) \text{ \& } 91.6(5)^\circ$

{Molecules have 2-fold symmetry and assemble into a helical, one-dimensional chain via an average of two  $\text{Hg}\cdots\text{S}$  contacts per molecule and eight-membered  $\{\cdots\text{HgCPS}\}_2$  synthons with chair conformations whereby one each of the P-C bonds lies above and below the plane defined by the  $\{\text{HgS}\}_2$  atoms}

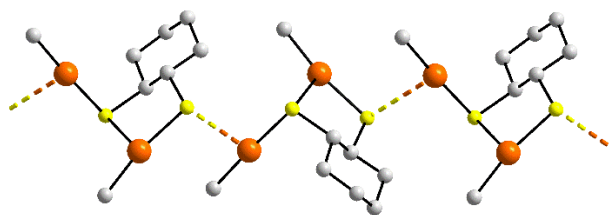

**Figure S53.** CHMEHG ( $\mu$ -trans-Cyclohexane-1,2-dithiolato)-bis(methyl-mercury(II)) 1980 [81].

$d(\text{Hg}\cdots\text{S}) = 3.296(4) \text{ \AA}$ ;  $\text{Hg}-\text{S}\cdots\text{Hg} = 105.28(13)^\circ$ ;  $\text{C}-\text{S}\cdots\text{Hg} = 104.2(4)^\circ$

$\text{S}-\text{Hg}\cdots\text{S} = 86.56(15)^\circ$ ;  $\text{C}-\text{Hg}\cdots\text{S} = 96.5(7)^\circ$

{Di-nuclear molecules assemble into a helical, one-dimensional chain via a single  $\text{Hg}\cdots\text{S}$  contact; an intramolecular  $\text{Hg}\cdots\text{S}$  contact of  $2.853(16) \text{ \AA}$  is noted}

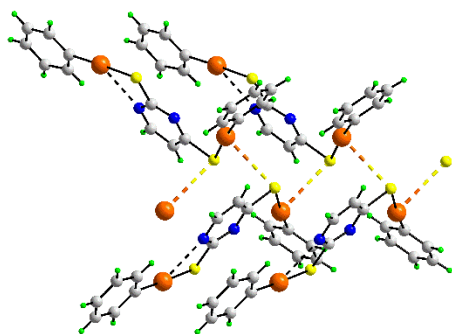

**Figure S54.** LOPGUT ( $\mu_2$ -2,4-Pyrimidinedithiolato)-diphenyl-di-mercury(II) [82].

$d(\text{Hg}\cdots\text{S}) = 3.303(4) \text{ \AA}$ ;  $\text{Hg}-\text{S}\cdots\text{Hg} = 114.98(12)^\circ$ ;  $\text{C}-\text{S}\cdots\text{Hg} = 83.6(4)^\circ$

$\text{S}-\text{Hg}\cdots\text{S} = 79.66(11)^\circ$ ;  $\text{C}-\text{Hg}\cdots\text{S} = 95.7(4)^\circ$

{The di-nuclear molecules into a helical, one-dimensional chain via  $\text{Hg}\cdots\text{S}$  contacts involving one mercury atom only. Weaker, intra-chain  $\text{Hg}\cdots\text{S}$  contacts of  $3.369(4) \text{ \AA}$  involving the same mercury atom and the second sulphur atom are noted. An intramolecular  $\text{Hg}\cdots\text{N}$  contact of  $2.774(11) \text{ \AA}$  is also noted}

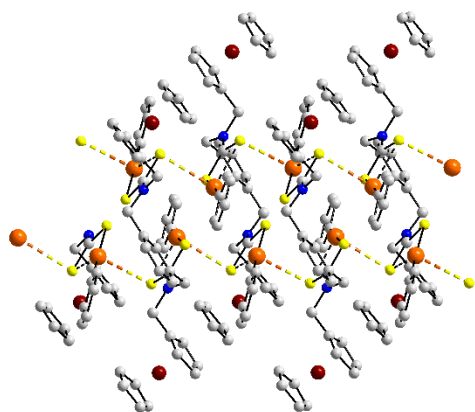

**Figure S55.** FUPFOM ( $\mu_2$ -N,N'-(1,3-dimethylphenylene)-bis(ferrocenylmethylthiocarbamato))-bis(phenyl-mercury) diethyl ether solvate [40].

$d(\text{Hg}\cdots\text{S}) = 3.268(3) \text{ \AA}$ ;  $\text{C}-\text{S}\cdots\text{Hg} = 91.1(4)^\circ$

$\text{S}-\text{Hg}\cdots\text{S} = 83.52(9)^\circ$ ;  $\text{C}-\text{Hg}\cdots\text{S} = 96.6(3)^\circ$

$d(\text{Hg}\cdots\text{S}) = 3.303(3) \text{ \AA}$ ;  $\text{C}-\text{S}\cdots\text{Hg} = 91.7(4)^\circ$

$\text{S}-\text{Hg}\cdots\text{S} = 84.37(9)^\circ$ ;  $\text{C}-\text{Hg}\cdots\text{S} = 95.4(3)^\circ$

{The non-symmetric di-nuclear molecule associates into a helical supramolecular chain via two  $\text{Hg}\cdots\text{S}$  interactions, one per mercury atom. The dithiocarbamate ligands link the chains into a tape. An intramolecular  $\text{Hg}\cdots\text{S}$  contact in each residue is noted = 2.877(3) and 2.882(3)  $\text{\AA}$ }

## 2.4. Twisted

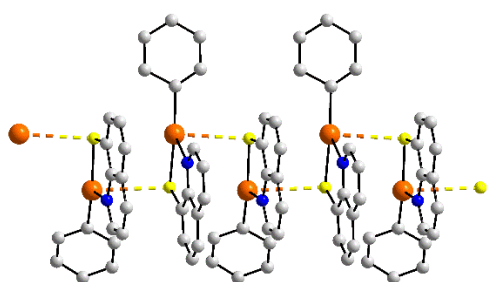

**Figure S56.** CECWOW 8-Mercaptoquinolinato-phenyl-mercury(II) [83].

$d(\text{Hg}\cdots\text{S}) = 3.249(11) \text{ \AA}$ ;  $\text{Hg}-\text{S}\cdots\text{Hg} = 93.99(18)^\circ$ ;  $\text{C}-\text{S}\cdots\text{Hg} = 100.7(3)^\circ$

$\text{S}-\text{Hg}\cdots\text{S} = 89.40(18)^\circ$ ;  $\text{C}-\text{Hg}\cdots\text{S} = 92.1(7)^\circ$

$d(\text{Hg}\cdots\text{S}) = 3.350(6) \text{ \AA}$ ;  $\text{Hg}-\text{S}\cdots\text{Hg} = 95.6(2)^\circ$ ;  $\text{C}-\text{S}\cdots\text{Hg} = 102.3(2)^\circ$

$\text{S}-\text{Hg}\cdots\text{S} = 87.74(18)^\circ$ ;  $\text{C}-\text{Hg}\cdots\text{S} = 94.0(7)^\circ$

{Two independent molecules. These are connected by the shortest Hg $\cdots$ S contact. The dimers assemble into a twisted, one-dimensional chain owing to the skewed disposition of the independent molecules. Two additional intra-chain Hg $\cdots$ S contacts are noted, i.e., 3.349(11) and 3.395(6) Å which when combined with the above generates a supramolecular tape. Intramolecular Hg $\cdots$ N contacts are also present: 2.46(2) and 2.46(2) Å}

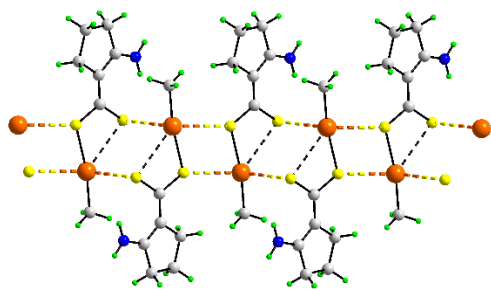

**Figure S57.** **IHOLEW01** (2-Aminocyclopent-1-ene-1-carbodithioato)-methyl-mercury(II) [39].

$d(\text{Hg}\cdots\text{S}) = 3.1797(17)$  Å;  $\text{C}-\text{S}\cdots\text{Hg} = 94.64(15)^\circ$

$\text{S}-\text{Hg}\cdots\text{S} = 90.45(4)^\circ$ ;  $\text{C}-\text{Hg}\cdots\text{S} = 96.72(17)^\circ$

$d(\text{Hg}\cdots\text{S}) = 3.3501(12)$  Å;  $\text{Hg}-\text{S}\cdots\text{Hg} = 111.66(4)^\circ$ ;  $\text{C}-\text{S}\cdots\text{Hg} = 145.95(16)^\circ$

$\text{S}-\text{Hg}\cdots\text{S} = 68.34(4)^\circ$ ;  $\text{C}-\text{Hg}\cdots\text{S} = 105.81(17)^\circ$

{Two molecules associated about a centre of inversion to form a dimer, involving the shorter of the Hg $\cdots$ S contacts. The dimers are connected into a linear, supramolecular chain by Hg $\cdots$ S at the limit of the search criteria. An intramolecular Hg $\cdots$ S contact is noted with Hg $\cdots$ S = 3.1747(11) Å. See **IHOLEW** (1) for a polymorphic crystal}

## 2.5. Square-Wave

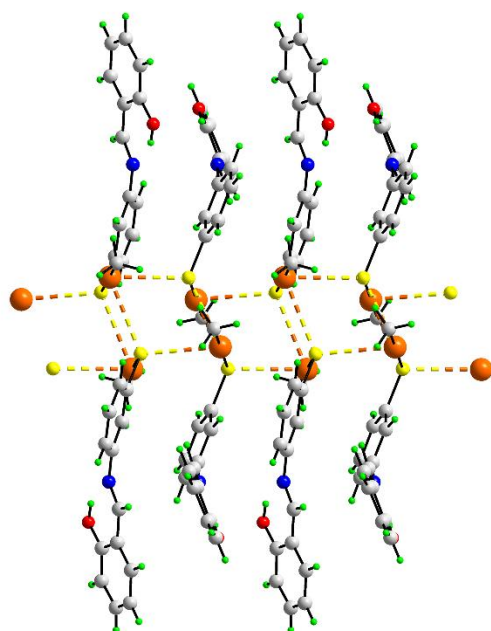

**Figure S58.** QUGVOD (3-(o-Hydroxybenzylideneamino)phenylthiolato)-methyl-mercury(II) [66].

$d(\text{Hg}\cdots\text{S}) = 3.240(3) \text{ \AA}$ ;  $\text{Hg}-\text{S}\cdots\text{Hg} = 95.18(10)^\circ$ ;  $\text{C}-\text{S}\cdots\text{Hg} = 131.4(4)^\circ$

$\text{S}-\text{Hg}\cdots\text{S} = 84.82(10)^\circ$ ;  $\text{C}-\text{Hg}\cdots\text{S} = 96.3(5)^\circ$

$d(\text{Hg}\cdots\text{S}) = 3.251(3) \text{ \AA}$ ;  $\text{Hg}-\text{S}\cdots\text{Hg} = 91.80(11)^\circ$ ;  $\text{C}-\text{S}\cdots\text{Hg} = 131.3(4)^\circ$

$\text{S}-\text{Hg}\cdots\text{S} = 88.20(11)^\circ$ ;  $\text{C}-\text{Hg}\cdots\text{S} = 93.5(4)^\circ$

$d(\text{Hg}\cdots\text{S}) = 3.128(3) \text{ \AA}$ ;  $\text{Hg}-\text{S}\cdots\text{Hg} = 106.76(11)^\circ$ ;  $\text{C}-\text{S}\cdots\text{Hg} = 111.9(4)^\circ$

$\text{S}-\text{Hg}\cdots\text{S} = 88.27(10)^\circ$ ;  $\text{C}-\text{Hg}\cdots\text{S} = 92.8(5)^\circ$

$d(\text{Hg}\cdots\text{S}) = 3.160(3) \text{ \AA}$ ;  $\text{Hg}-\text{S}\cdots\text{Hg} = 108.01(11)^\circ$ ;  $\text{C}-\text{S}\cdots\text{Hg} = 107.3(4)^\circ$

$\text{S}-\text{Hg}\cdots\text{S} = 87.11(10)^\circ$ ;  $\text{C}-\text{Hg}\cdots\text{S} = 93.1(4)^\circ$

{Two independent molecules and each assembles into a dimeric aggregate across an inversion centre of via two  $\text{Hg}\cdots\text{S}$  interactions (first two entries). These associate into a supramolecular chain (square-wave) owing to the different orientations of the dimeric aggregates}

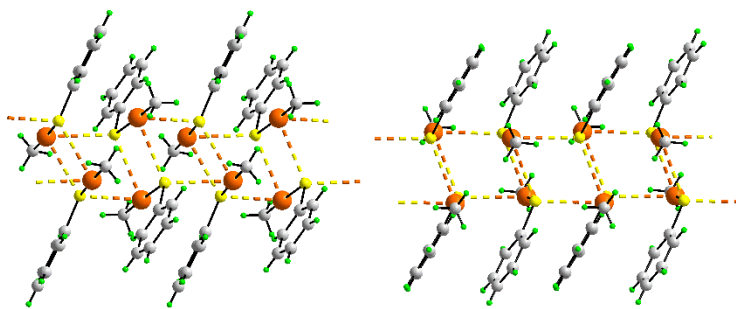

**Figure S59.** DOFNIW Methyl-(phenylthiolato)-mercury(II) [76].

$d(\text{Hg}\cdots\text{S}) = 3.2491(14) \text{ \AA}$ ;  $\text{Hg}-\text{S}\cdots\text{Hg} = 96.07(5)^\circ$ ;  $\text{C}-\text{S}\cdots\text{Hg} = 127.22(17)^\circ$

$\text{S}-\text{Hg}\cdots\text{S} = 83.93(4)^\circ$ ;  $\text{C}-\text{Hg}\cdots\text{S} = 97.3(2)^\circ$

$d(\text{Hg}\cdots\text{S}) = 3.2406(13) \text{ \AA}$ ;  $\text{Hg}-\text{S}\cdots\text{Hg} = 104.36(5)^\circ$ ;  $\text{C}-\text{S}\cdots\text{Hg} = 109.2(2)^\circ$

$\text{S}-\text{Hg}\cdots\text{S} = 88.65(4)^\circ$ ;  $\text{C}-\text{Hg}\cdots\text{S} = 94.80(19)^\circ$

{Molecules assemble about a centre of inversion,  $\text{Hg}\cdots\text{S} = 3.2491(14) \text{ \AA}$ , to form a  $\{\text{HgS}\cdots\}_2$  rectangle. These are related to neighbouring rectangles via 2-fold symmetry with the result a supramolecular chain with a square-wave topology eventuates}

### 3. Two-dimensional array sustained by Hg $\cdots$ S secondary-bonding interactions

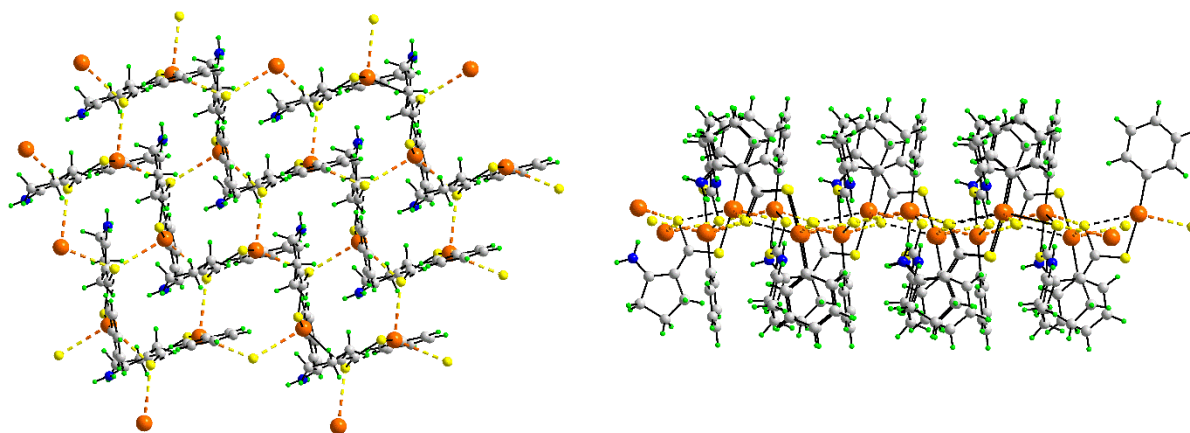

**Figure S60.** IHOLIA (2-Aminocyclopent-1-ene-1-carbodithioato)-phenyl-mercury(II) [39].

$d(\text{Hg}\cdots\text{S}) = 3.1834(11) \text{ \AA}$ ;  $\text{C}-\text{S}\cdots\text{Hg} = 98.61(13)^\circ$

$\text{S}-\text{Hg}\cdots\text{S} = 93.66(3)^\circ$ ;  $\text{C}-\text{Hg}\cdots\text{S} = 90.88(12)^\circ$

$d(\text{Hg}\cdots\text{S}) = 3.2269(10) \text{ \AA}$ ;  $\text{C}-\text{S}\cdots\text{Hg} = 102.17(12)^\circ$

$\text{S}-\text{Hg}\cdots\text{S} = 81.60(3)^\circ$ ;  $\text{C}-\text{Hg}\cdots\text{S} = 101.38(10)^\circ$

{The mercury atom forms two Hg $\cdots$ S contacts with two different molecules so a hexagonal arrangement of Hg $\cdots$ S contacts is apparent when two intramolecular contacts are taken into account. The noted intramolecular Hg $\cdots$ S contact has  $\text{Hg}\cdots\text{S} = 3.1286(10) \text{ \AA}$ }

### 4. Aggregation patterns sustained by Hg $\cdots$ S secondary-bonding interactions in supramolecular coordination polymers

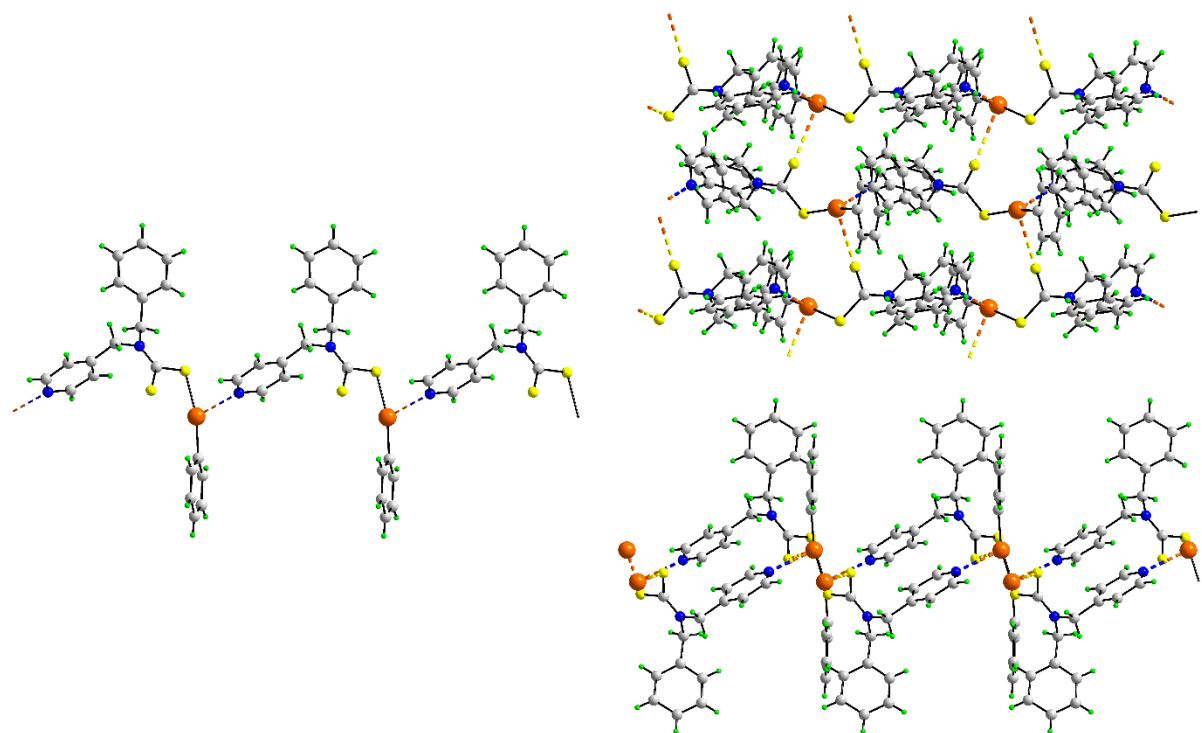

**Figure S61.** EBUSIF Phenyl-(benzyl(pyridin-4-ylmethyl)carbamodithioato)-mercury(II) [86].

$d(\text{Hg}\cdots\text{S}) = 3.203(5) \text{ \AA}$ ;  $\text{C}-\text{S}\cdots\text{Hg} = 122.7(7)^\circ$

$\text{S}-\text{Hg}\cdots\text{S} = 79.0(2)^\circ$ ;  $\text{C}-\text{Hg}\cdots\text{S} = 100.5(5)^\circ$

{Molecules assemble into a linear (translational symmetry) coordination polymer as the multifunctional dithiocarbamate ligand is bidentate, bridging via one sulphur and a pyridyl-nitrogen atom ( $\text{Hg}\cdots\text{N} = 2.74(2) \text{ \AA}$ ); an intramolecular  $\text{Hg}\cdots\text{S}$  contact ( $= 2.993(5) \text{ \AA}$ ) is noted. Chains are connected into a two-dimensional array with a step-ladder topology via  $\text{Hg}\cdots\text{S}$  interactions}

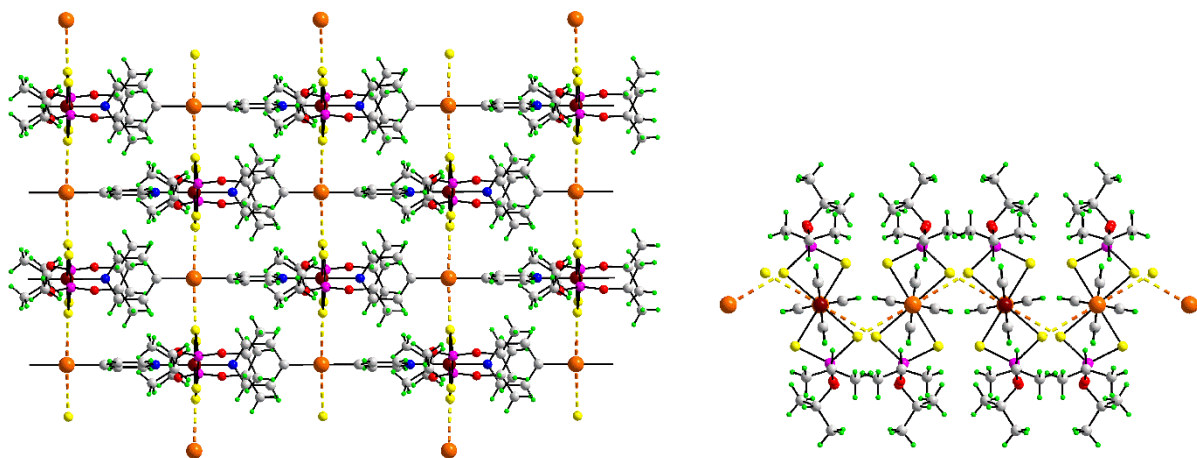

**Figure S62.** COCJUC catena-(bis( $\mu$ -Pyridin-4-yl)-bis(O,O'-di-isopropyldithiophosphato)-mercury-nickel(II) [87].

$d(\text{Hg}\cdots\text{S}) = 3.2960(12) \text{ \AA}$ ;  $\text{Ni-S}\cdots\text{Hg} = 109.33(4)^\circ$ ;  $\text{P-S}\cdots\text{Hg} = 165.54(7)^\circ$

$\text{C-Hg}\cdots\text{S} = 88.58(17) \text{ \& } 91.42(17)^\circ$ ;  $\text{S}\cdots\text{Hg}\cdots\text{S} = 177.17(3)^\circ$

{Di(4-pyridyl)mercury molecules link  $\text{Ni}[\text{S}_2\text{P}(\text{O-i-Pr})_2]_2$  molecules into a linear supramolecular chain situated about a 2-fold axis of symmetry. The chains are assembled into a flat, two-dimensional array by  $\text{Hg}\cdots\text{S}$  interactions}
